# Supplementary material
Source: PubMed Central journal article supplement (PMC6580449)
Supplement: jamaneurol-76-1035-s001.pdf [file jamaneurol-76-1035-s001.pdf]

## Supplementary Online Content

Bridel C, van Wieringen WN, Zetterberg H, Tijms BM, Teunissen CE; NFL Group. Diagnostic value of cerebrospinal fluid neurofilament light protein in neurology: a systematic review and meta-analysis. *JAMA Neurol*. Published online June 17, 2019. doi:10.1001/jamaneurol.2019.1534

**eFigure 1.** Flow Diagram of Literature Search and Study Selection

**eFigure 2.** cNfL in Neurological Conditions According to Age

**eTable 1.** Diagnostic Categories and Their Demographics

**eTable 2.** Cerebrospinal Fluid Neurofilament Light Percent Fold-Change Compared to Healthy Controls and Percent Yearly Decrease

**eTable 3.** Ratio Between Male and Female Mean Cerebrospinal Fluid Neurofilament Light Values

**eTable 4.** Mean Cerebrospinal Fluid Neurofilament Light Ratios Across Clinically Similar Disorders

**eTable 5.** Mean Cerebrospinal Fluid Neurofilament Light Ratios per 10-Years Age Ranges

**eTable 6.** Intercohort Heterogeneity Coefficient for Diagnostic Categories With More Than One Contributing Cohort

This supplementary material has been provided by the authors to give readers additional information about their work.

**eFigure 1.** Flow Diagram of Literature Search and Study Selection

Figure 1

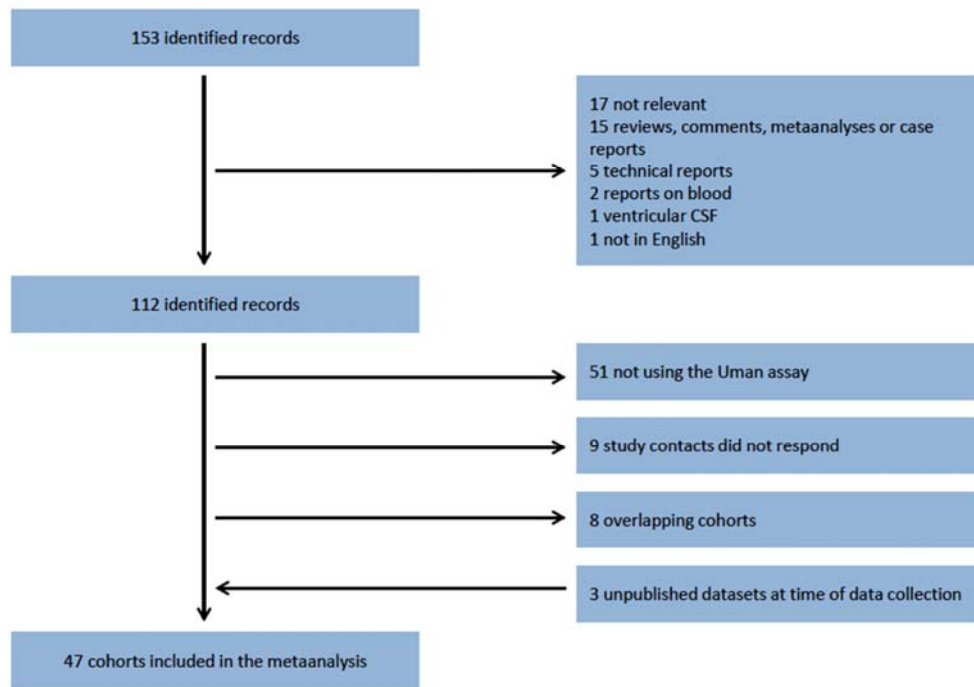

**eFigure 2.** cNfL in Neurological Conditions According to Age

**Legend**

Log cNfL values in picogrammes per milliliters (pg/mL) according to age in healthy controls (HC, **A and B**), Subjective neurological complaints (SNC, **A**), optic neuritis (ON, **A**), inflammatory diseases of the CNS other than MS (IND, **A**), premanifest Huntington's disease (pHD, **B**), Huntington's disease (HD, **B**), presymptomatic genetic frontotemporal dementia (pgFTD, **B**), frontotemporal dementia (FTD, **B**), combination of FTD and amyotrophic lateral sclerosis (FTD/ALS, **B**). Shades around regression lines represent standard errors.

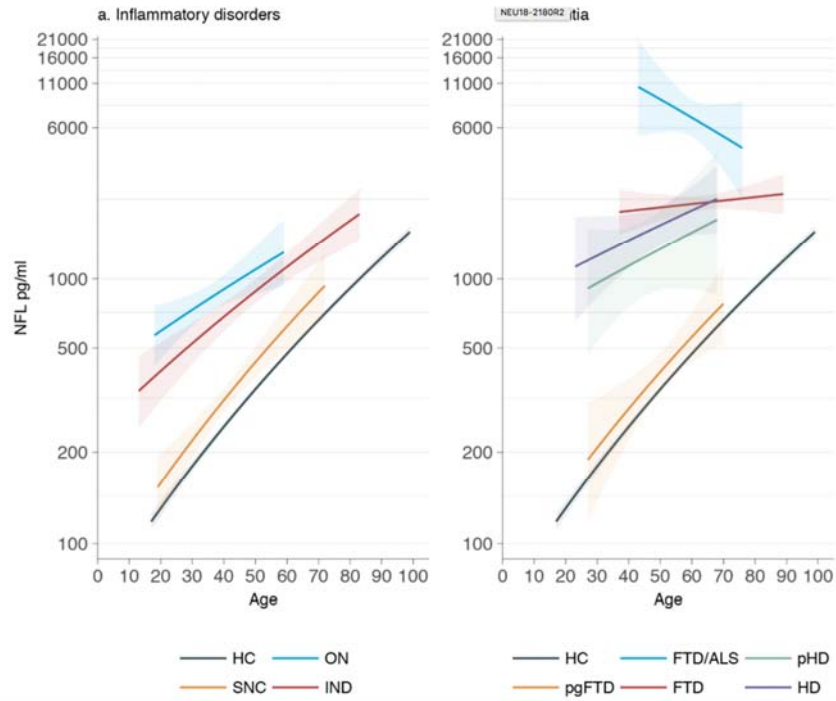

**eTable 1.** Diagnostic Categories and Their Demographics

|                    | Number of participants | % of total participants | Mean age in years (SD) | Gender (%female) | Number of contributing cohorts |
|--------------------|------------------------|-------------------------|------------------------|------------------|--------------------------------|
| Total              | 10,059                 | 100.0                   | 59.7(18.8)             | 54.1             | 47                             |
| HC                 | 1,332                  | 13.3                    | 55.7 (18.8)            | 53.9             | 30                             |
| SNC                | 45                     | 0.4                     | 40.8(10.4)             | 86.7             | 2                              |
| CIS                | 581                    | 5.8                     | 34.2(10.0)             | 72.5             | 9                              |
| ON                 | 142                    | 1.4                     | 35.4(9.8)              | 75.4             | 3                              |
| tRRMS              | 277                    | 2.1                     | 39.4(8.8)              | 87.4             | 6                              |
| uRRMS              | 1,139                  | 11.4                    | 37.7(9.1)              | 57.1             | 11                             |
| SPMS               | 162                    | 1.6                     | 50.8(9.4)              | 56.2             | 7                              |
| PPMS               | 90                     | 0.9                     | 49.7(11.1)             | 42.2             | 7                              |
| IND                | 404                    | 4.0                     | 49.2(15.2)             | 70.4             | 3                              |
| SCD                | 24                     | 0.2                     | 62.2(4.4)              | 37.5             | 1                              |
| MCI                | 227                    | 2.3                     | 74.2(7.3)              | 35.7             | 3                              |
| AD                 | 1,827                  | 18.2                    | 72.1(8.6)              | 61.8             | 10                             |
| pgFTD              | 42                     | 0.4                     | 50.8(9.7)              | 66.7             | 1                              |
| FTD                | 339                    | 3.4                     | 64.3(9.4)              | 46.9             | 5                              |
| VaD                | 491                    | 4.9                     | 76.1(7.9)              | 44.2             | 2                              |
| DLB                | 183                    | 1.8                     | 73.5(7.1)              | 27.3             | 2                              |
| iNPH               | 56                     | 0.6                     | 72.4(6.9)              | 50.0             | 2                              |
| DNS                | 558                    | 5.6                     | 72.9(9.0)              | 49.8             | 2                              |
| MD                 | 520                    | 5.2                     | 78.3(6.8)              | 53.1             | 2                              |
| pHD                | 13                     | 0.1                     | 44.4 (14.2)            | 53.8             | 1                              |
| HD                 | 30                     | 0.3                     | 50.4 (12.2)            | 53.3             | 1                              |
| iHIV               | 27                     | 0.3                     | 45.1(9.5)              | 22.2             | 2                              |
| PD                 | 375                    | 3.7                     | 64.7(10.8)             | 35.2             | 5                              |
| PDD                | 101                    | 1.0                     | 72.7(7.3)              | 27.7             | 2                              |
| MSA                | 158                    | 1.6                     | 63.6(8.5)              | 46.2             | 5                              |
| PSP                | 118                    | 1.2                     | 69.9(7.2)              | 50.0             | 4                              |
| CBS                | 49                     | 0.5                     | 69.2(7.2)              | 59.2             | 4                              |
| ALS                | 75                     | 0.7                     | 59.1(10.5)             | 33.3             | 2                              |
| FTD/ALS            | 26                     | 0.3                     | 60.2(7.1)              | 42.3             | 1                              |
| CIDP/GBS           | 26                     | 0.3                     | 61.3(13.6)             | 23.1             | 2                              |
| NID                | 418                    | 4.2                     | 40.5(14.4)             | 60.3             | 6                              |
| Stroke             | 24                     | 0.2                     | 72.2(11.9)             | 33.3             | 2                              |
| BD                 | 133                    | 1.3                     | 40.0(13.6)             | 60.9             | 1                              |
| HIV*               | 14                     | 0.1                     | 43.4(9.5)              | 7.1              | 1                              |
| Cushing's disease* | 12                     | 0.1                     | 45.8(13.9)             | 100              | 1                              |
| Cardiac arrest*    | 21                     | 0.2                     | 61.3(14.1)             | 14.3             | 1                              |

**Legend**

HC: healthy controls; SNC: subjective neurological complaints; CIS: clinically isolated syndrome; ON: optic neuritis; uRRMS: untreated relapsing-remitting multiple sclerosis; tRRMS: treated relapsing-remitting multiple sclerosis; SPMS: secondary progressive multiple sclerosis; PPMS: primary progressive multiple sclerosis; IND: inflammatory diseases of the central nervous system (CNS) other than multiple sclerosis; ALS: amyotrophic lateral sclerosis; CIDP/GBS: chronic inflammatory radiculoneuropathy and Guillain Barré syndrome; FTD: fronto temporal dementia; MCI: mild cognitive impairment; AD: Alzheimer's disease; VaD: vascular dementia; iNPH: idiopathic normal pressure hydrocephaly; MD: mixed dementia; DNS: dementia of unspecified origin; HD: Huntington's disease; pHD: premanifest HD; iHIV: HIV positive individuals with cognitive impairment; PD: Parkinson's disease; PDD: Parkinson's disease dementia; DLB: dementia with Lewy Bodies; MSA: multiple system atrophy; PSP: progressive supranuclear palsy; CBS: corticobasal syndrome; NID: non inflammatory diseases of the CNS; pgFTD: presymptomatic genetic FTD; FTD/ALS: combined FTD and ALS; HIV: HIV positive individuals; BD: bipolar disorder; SCD: subjective cognitive decline; SD: standard deviation. \*Cohorts with <5 observations per gender were not included in the statistical models.

**eTable 2.** Cerebrospinal Fluid Neurofilament Light Percent Fold-Change Compared to Healthy Controls and Percent Yearly Decrease

| Diagnosis | Fold change (95% CI) compared to HC | yearly increase in CSF NFL in % (95%CI), p-value |
|-----------|-------------------------------------|--------------------------------------------------|
| HC        | 1.00                                | 3.30 (2.98-3.62), ****                           |
| pgFTD     | 1.00 (0.60-1.68)                    | 3.34 (0.92-5.81), ***                            |
| PD        | 1.08 (0.87-1.33)                    | 3.50 (2.76-4.24), ****                           |
| SCD       | 1.16 (0.53-2.55)                    | 7.85 (0.70-15.51), *                             |
| SNC       | 1.25 (0.73-2.15)                    | 3.48 (1.34-5.67), ****                           |
| BD        | 1.28 (0.85-1.94)                    | 3.44 (2.48-4.40), ****                           |
| MCI       | 1.39 (1.05-1.82)                    | 2.23 (0.88-3.60), ****                           |
| PDD       | 1.40 (1.03-1.92)                    | 3.10 (1.08-5.17), ****                           |
| NID       | 1.53 (1.17-1.90)                    | 3.18 (2.67- 3.69), ****                          |
| DLB       | 1.57 (1.22-2.01)                    | 2.51 (0.98-4.06), ****                           |
| CIDP/GBS  | 1.57 (0.77-3.22)                    | 2.49 (0.33-4.68), *                              |
| AD        | 1.86 (1.60-2.17)                    | 2.01 (1.60-2.43), ****                           |
| iNPH      | 1.98 (1.06-3.71)                    | 4.98 (1.71-8.35), ***                            |
| DNS       | 2.07 (1.71-2.51)                    | 1.50 (0.82-2.20), ****                           |
| SPMS      | 2.21 (1.59-3.07)                    | 0.70 (-0.55- 1.96), ns                           |
| PPMS      | 2.23 (1.51-3.31)                    | -0.02 (-1.45-1.42), ns                           |
| MD        | 2.30 (1.89-2.80)                    | 2.42 (1.48-3.38), ****                           |
| VaD       | 2.49 (2.04-3.03)                    | 1.78 (0.94-2.63), ****                           |

|         |                    |                            |
|---------|--------------------|----------------------------|
| PSP     | 2.77 (2.06-3.72)   | 1.13 (-0.73-3.01), ns      |
| CIS     | 2.96 (2.31-3.78)   | 0.72 (0.12-1.33), *        |
| tRRMS   | 3.25 (2.45-4.32)   | -0.03 (-0.82-0.77), ns     |
| IND     | 3.47 (2.66-4.52)   | 2.62 (2.13-3.11), ****     |
| MSA     | 3.63 (2.77-4.75)   | -0.68 (-2.03-0.69), ns     |
| ON      | 3.73 (2.02-6.89)   | 2.12 (0.85-3.40), ****     |
| uRRMS   | 3.84 (3.04-4.86)   | -1.08 (-1.47- -0.69), **** |
| FTD     | 3.91 (3.17-4.83)   | 0.41 (-0.45-1.28), ns      |
| pHD     | 3.94 (1.36-11.44)  | 1.87 (-1.12-4.94), ns      |
| CBS     | 4.03 (2.61-6.21)   | 1.21 (-1.69-4.19), ns      |
| Stroke  | 4.63 (2.12-10.09)  | 4.59 (1.70-7.57), ***      |
| HD      | 5.88 (2.43-14.27)  | 1.73 (-0.47 -3.98), ns     |
| ALS     | 7.58 (4.49-12.81)  | 0.78 (-0.86-2.45), ns      |
| FTD/ALS | 10.48 (4.85-22.67) | -2.46 (-6.42-1.67), ns     |
| iHIV    | 21.36 (9.86-46.30) | 1.93 (-1.07-5.02), ns      |

**Legend:** P-values: \*\*\*\* is  $p < \text{or} = 0.0001$ ; \*\*\* is  $p < \text{or} = 0.001$ ; \*\* is  $p < \text{or} = 0.01$ ; \* is  $p < \text{or} = 0.05$ ; non significant (ns) is  $p > 0.5$ . pgFTD, presymptomatic genetic FTD; PD, Parkinson's disease; SCD, Subjective cognitive decline; SNC, subjective neurological complaints; BD, bipolar disorder; MCI, mild cognitive impairment; PDD, PD dementia; NID, non-inflammatory neurological disorders; DLB, Dementia with Lewy bodies; CIDP/GBS, chronic inflammatory demyelinating polyradiculopathy and Guillain-Barré syndrome; AD, Alzheimer's disease; iNPH, idiopathic normal pressure hydrocephalus; DNS, dementia not specified; SPMS, secondary progressive multiple sclerosis; PPMS, primary progressive multiple sclerosis; MD, mixed dementia; VaD, vascular dementia; PSP, progressive supranuclear palsy; CIS, clinically isolated syndrome; uRRMS, relapsing remitting multiple sclerosis without treatment; IND, inflammatory neurological disorders other than multiple sclerosis; MSA, multiple systems atrophy; ON, optic neuritis; tRRMS, relapsing remitting multiple sclerosis with disease modifying treatment; FTD, frontotemporal dementia; CBS, corticobasal syndrome; HD, Huntington's disease; ALS, amyotrophic lateral sclerosis; FTD/ALS, combined FTD and ALS; iHIV, HIV with cognitive impairment.

**eTable 3.** Ratio Between Male and Female Mean Cerebrospinal Fluid Neurofilament Light Values

| Diagnosis      | M/F ratio | 95% CI    | p-value |
|----------------|-----------|-----------|---------|
| HC             | 1.26      | 1.16-1.37 | ****    |
| CIS            | 1.11      | 0.97-1.27 | ns      |
| ON             | 1.15      | 0.86-1.53 | ns      |
| Treated RRMS   | 1.21      | 1.00-1.46 | *       |
| Untreated RRMS | 1.16      | 1.06-1.27 | **      |
| SPMS           | 1.38      | 1.09-1.74 | **      |
| PPMS           | 1.76      | 1.28-2.41 | ***     |
| IND            | 1.76      | 1.50-2.07 | ****    |
| SNC            | 0.88      | 0.46-1.68 | ns      |
| ALS            | 1.12      | 0.78-1.61 | ns      |
| CIDP/GBS       | 1.49      | 0.75-2.96 | ns      |
| FTD            | 1.01      | 0.86-1.18 | ns      |
| pgFTD          | 1.44      | 0.89-2.32 | ns      |
| FTD/ALS        | 0.90      | 0.50-1.61 | ns      |
| SCD            | 1.26      | 0.68-2.34 | ns      |
| MCI            | 1.10      | 0.90-1.35 | ns      |
| AD             | 1.21      | 1.13-1.30 | ****    |
| iNPH           | 1.02      | 0.69-1.51 | ns      |
| VaD            | 1.22      | 1.07-1.40 | **      |
| MD             | 1.18      | 1.04-1.35 | **      |
| DNS            | 1.26      | 1.11-1.42 | ***     |
| PD             | 1.15      | 0.98-1.35 | ns      |
| PDD            | 1.07      | 0.77-1.48 | ns      |
| MSA            | 0.91      | 0.72-1.15 | ns      |
| PSP            | 1.02      | 0.78-1.34 | ns      |
| CBS            | 1.27      | 0.83-1.94 | ns      |
| DLB            | 1.00      | 0.79-1.28 | ns      |
| iHIV           | 1.13      | 0.52-2.46 | ns      |
| pHD            | 0.98      | 0.43-2.22 | ns      |
| HD             | 1.30      | 0.76-2.23 | ns      |
| BD             | 1.39      | 1.07-1.80 | **      |
| Stroke         | 0.75      | 0.40-1.42 | ns      |
| NID            | 1.60      | 1.38-1.85 | ****    |

**Legend** M. male; F. female; HC. healthy controls; SNC. subjective neurological complaints; CIS. clinically isolated syndrome; ON. optic neuritis; RRMS. relapsing remitting multiple sclerosis; PPMS. primary progressive multiple sclerosis; SPMS. secondary progressive multiple sclerosis; IND. inflammatory neurological disorders



other than multiple sclerosis; SNC. subjective neurological complaint; ALS. amyotrophic lateral sclerosis; CIDP/GBS. chronic inflammatory demyelinating polyradiculopathy and Guillain-Barré syndrome; FTD. frontotemporal dementia; pgFTD. presymptomatic genetic FTD; ; FTD/ALS. combined FTD and ALS; SCD. Subjective cognitive decline; MCI. mild cognitive impairment; AD. Alzheimer's disease; iNPH. idiopathic normal pressure hydrocephalus; VaD. vascular dementia; MD. mixed dementia; DNS. dementia not specified; ; PD. Parkinson's disease; PDD. PD dementia; PSP. progressive supranuclear palsy; MSA. multiple systems atrophy; CBS. corticobasal syndrome; DLB. Dementia with Lewy bodies; iHIV. HIV with cognitive impairment; pHD. premanifest Huntington's disease; HD. Huntington's disease; BD. bipolar disorder; NID. non-inflammatory neurological disorders. 95% CI, 95% confidence intervals. P-values: \*\*\*\* is  $p \leq 0.0001$ ; \*\*\* is  $p \leq 0.001$ ; \*\* is  $p \leq 0.01$ ; \* is  $p \leq 0.05$ ; non significant (ns) is  $p > 0.5$ .

**eTable 4.** Mean Cerebrospinal Fluid Neurofilament Light Ratios Across Clinically Similar Disorders

A

|       | SNC                    | CIS                    | ON                   | uRRMS                  | tRRMS                | SPMS                   | PPMS                 |
|-------|------------------------|------------------------|----------------------|------------------------|----------------------|------------------------|----------------------|
| SNC   | 1                      | -                      | -                    | -                      | -                    | -                      | -                    |
| CIS   | 2.38 (1.41-4.00), **** | 1                      | -                    | -                      | -                    | -                      | -                    |
| ON    | 3.03 (1.32-6.67), **** | 1.26 (0.66-2.43), ns   | 1                    | -                      | -                    | -                      | -                    |
| uRRMS | 3.03 (1.85-5.00), **** | 1.30 (1.11-1.52), **** | 1.03 (0.54-1.97), ns | 1                      | -                    | -                      | -                    |
| tRRMS | 2.63 (1.54-4.35), **** | 1.10 (0.88-1.38), ns   | 0.87 (0.45-1.70), ns | 0.85 (0.69-1.03), ns   | 1                    | -                      | -                    |
| SPMS  | 1.75 (1.02-3.03), *    | 0.75 (0.99-1.81), ns   | 0.59 (0.30-1.18), ns | 0.57 (0.43-0.77), **** | 0.68 (0.49-0.94), ** | 1                      | -                    |
| PPMS  | 1.79 (0.97-3.23), ns   | 0.76 (0.52-1.09), ns   | 0.60 (0.29-1.23), ns | 0.58 (0.41-0.83), **** | 0.69 (0.47-1.02), ns | 1.01 (0.68-1.50), ns   | 1                    |
| IND   | 2.78 (1.64-4.76), **** | 1.17 (0.95-1.44), ns   | 0.93 (0.48-1.80), ns | 0.90 (0.75-1.08), ns   | 1.07 (0.75-1.08), ns | 1.57 (1.14-2.16), **** | 1.55 (1.05-2.28), ** |

B

|         | SCD                      | MCI                      | AD                       | pgFTD                    | FTD                     | FTD/ALS                | VaD                     | DLB                      | iNPH                     | DNS                      | MD                      | pHD                    | HD                   |
|---------|--------------------------|--------------------------|--------------------------|--------------------------|-------------------------|------------------------|-------------------------|--------------------------|--------------------------|--------------------------|-------------------------|------------------------|----------------------|
| SCD     | 1                        | -                        | -                        | -                        | -                       | -                      | -                       | -                        | -                        | -                        | -                       | -                      | -                    |
| MCI     | 1.20 (0.53-2.73), ns     | 1                        | -                        | -                        | -                       | -                      | -                       | -                        | -                        | -                        | -                       | -                      | -                    |
| AD      | 1.61 (0.74-3.49), ns     | 1.34 (1.01-1.78), *      | 1                        | -                        | -                       | -                      | -                       | -                        | -                        | -                        | -                       | -                      | -                    |
| pgFTD   | 0.86 (0.34-2.17), ns     | 0.72 (0.40-1.28), ns     | 1.86 (1.10-3.14), **     | 1                        | -                       | -                      | -                       | -                        | -                        | -                        | -                       | -                      | -                    |
| FTD     | 3.33 (1.54-7.69), ****   | 2.86 (2.04-3.85), ****   | 2.08 (1.72-2.56), ****   | 3.85 (2.38-6.67), ****   | 1                       | -                      | -                       | -                        | -                        | -                        | -                       | -                      | -                    |
| FTD/ALS | 9.05 (1.92-10.38), ****  | 7.69 (3.33-16.67), ****  | 5.55 (2.63-12.50), ****  | 10.48 (4.19-26.23), **** | 2.68 (1.23-5.82), ***   | 1                      | -                       | -                        | -                        | -                        | -                       | -                      | -                    |
| VaD     | 2.15 (0.97-4.72), ns     | 1.79 (1.31-2.45), ****   | 1.33 (1.15-1.55), ****   | 2.49 (1.45-4.25), ****   | 0.64 (0.51-0.80), ****  | 0.24 (0.11-0.51), **** | 1                       | -                        | -                        | -                        | -                       | -                      | -                    |
| DLB     | 1.35 (0.60-3.03), ns     | 1.13 (0.80-1.61), ns     | 0.84 (0.67-1.06), ns     | 1.57 (0.89-2.75), ns     | 0.40 (0.30-0.53), ****  | 0.15 (0.07-0.33), **** | 0.63 (0.49-0.81), ****  | 1                        | -                        | -                        | -                       | -                      | -                    |
| iNPH    | 1.71 (0.63-4.65), ns     | 1.43 (0.73-2.82), ns     | 1.07 (0.57-2.00), ns     | 1.98 (0.88-4.45), ns     | 0.51 (0.26-0.97), *     | 0.19 (0.07-0.51), **** | 0.80 (0.42-1.51), ns    | 1.27 (0.65-2.44), ns     | 1                        | -                        | -                       | -                      | -                    |
| DNS     | 1.79 (0.81-3.93), ns     | 1.50 (1.10-2.04), ***    | 1.11 (0.97-1.28), ns     | 2.07 (1.21-3.54), ***    | 0.53 (0.42-0.66), ****  | 0.20 (0.09-0.43), **** | 0.83 (0.70-1.00), *     | 1.32 (1.03-1.69), **     | 1.04 (0.55-1.98), ns     | 1                        | -                       | -                      | -                    |
| MD      | 1.99 (0.90-4.38), ns     | 1.66 (1.22-2.77), ****   | 1.24 (1.07-1.43), ****   | 2.30 (1.35-3.94), ****   | 0.59 (0.47-0.74), ****  | 0.22 (0.10-0.48), **** | 0.93 (0.77-1.11), ns    | 1.47 (1.14-1.89), ****   | 0.86 (0.45-1.64), ns     | 1.11 (0.93-1.32), ns     | 1                       | -                      | -                    |
| pHD     | 3.40 (0.90-12.79), ns    | 2.84 (0.94-8.54), ns     | 2.11 (0.72-6.20), ns     | 3.94 (1.20-12.88), **    | 1.01 (0.34-2.98), ns    | 0.38 (0.10-1.40), ns   | 1.58 (0.54-4.68), ns    | 2.51 (0.84-7.50), ns     | 1.98 (0.58-6.82), ns     | 1.90 (0.64-5.61), ns     | 1.71 (0.58-5.05), ns    | 1                      | -                    |
| HD      | 5.08 (1.55-16.60), ****  | 4.24 (1.68-10.72), ****  | 3.16 (1.29-7.75), ***    | 5.88 (2.11-16.42), ****  | 1.50 (0.61-3.73), ns    | 0.56 (0.17-1.81), ns   | 2.37 (0.96-5.86), ns    | 3.76 (1.50-9.41), ****   | 2.96 (1.00-8.76), *      | 2.84 (1.15-7.02), *      | 2.55 (1.03-6.32), *     | 1.49 (0.58-3.85), ns   | 1                    |
| iHIV    | 18.44 (6.12-55.55), **** | 15.41 (6.79-34.99), **** | 11.47 (5.22-25.20), **** | 21.36 (8.42-54.19), **** | 5.46 (2.45-12.16), **** | 2.04 (0.68-6.06), ns   | 8.60 (3.87-19.08), **** | 13.63 (6.06-30.68), **** | 10.76 (3.99-29.06), **** | 10.31 (4.65-22.84), **** | 9.27 (4.18-20.57), **** | 5.56 (1.45-20.00), *** | 3.57 (1.12-11.11), * |

C

|     | HC                     | PD                     | PDD                    | MSA                    | PSP                    | CBS                    |
|-----|------------------------|------------------------|------------------------|------------------------|------------------------|------------------------|
| PD  | 1.08 (0.87-1.33), ns   | 1                      | -                      | -                      | -                      | -                      |
| PDD | 1.40 (1.03-1.92), **   | 1.30 (0.93-1.82), ns   | 1                      | -                      | -                      | -                      |
| MSA | 3.63 (2.77-4.75), **** | 3.36 (2.55-4.45), **** | 2.58 (1.77-3.77), **** | 1                      | -                      | -                      |
| PSP | 2.77 (2.06-3.72), **** | 2.57 (1.87-3.52), **** | 1.97 (1.33-2.93), **** | 0.76 (0.53-1.09), ns   | 1                      | -                      |
| CBS | 4.03 (2.61-6.21), **** | 3.74 (2.37-5.88), **** | 2.87 (1.72-4.78), **** | 1.11 (0.69-1.79), ns   | 1.46 (0.89-2.37), ns   | 1                      |
| DLB | 1.57 (1.22-2.01), **** | 1.45 (1.09-1.93), ***  | 1.12 (0.78-1.59), ns   | 0.43 (0.31-0.60), **** | 0.57 (0.40-0.81), **** | 0.39 (0.24-0.63), **** |

D

|          | HC                       | ALS                    |
|----------|--------------------------|------------------------|
| ALS      | 7.58 (4.49-12.81), ****  | 1                      |
| FTD/ALS  | 10.48 (4.85-22.67), **** | 1.38 (0.55-3.48), ns   |
| CIDP/GBS | 1.57 (0.77-3.22), ns     | 0.21 (0.10-0.42), **** |
| Stroke   | 4.63 (2.12-10.09), ****  | -                      |
| BD       | 1.28 (0.85-1.94), ns     | -                      |

**Legend** Mean CSF NfL ratios (95% confidence intervals) correspond to the ratios of the diagnosis in the entry column (y) over the diagnosis in the entry line (x) in each table. **A** SNC, subjective neurological complaints; CIS, clinically isolated syndrome; ON, optic neuritis; uRRMS, untreated relapsing remitting multiple sclerosis; tRRMS, treated relapsing remitting multiple sclerosis; PPMS, primary progressive multiple sclerosis; SPMS, secondary progressive multiple sclerosis. **B** SCD, Subjective cognitive decline; MCI, mild cognitive impairment; AD, Alzheimer's disease; pgFTD, presymptomatic genetic FTD; FTD, frontotemporal dementia; FTD/ALS, combined FTD and ALS; VaD, vascular dementia; DLB, Dementia with Lewy bodies; iNPH, idiopathic normal pressure hydrocephalus; DNS, dementia not specified; MD, mixed dementia; pHD, premanifest Huntington's disease; HD, Huntington's disease; iHIV, HIV with cognitive impairment. **C** PD, Parkinson's disease; PDD, PD dementia; MSA, multiple systems atrophy; PSP, progressive supranuclear palsy; CBS, corticobasal syndrome, DLB, dementia with Lewy Bodies. **D** ALS, amyotrophic lateral sclerosis; FTD/ALS, combined FTD and ALS; CIDP/GBS, chronic inflammatory demyelinating polyradiculopathy and Guillain-Barré syndrome; BD, bipolar disorder. P-values: \*\*\*\* is  $p < \text{or} = 0.0001$ ; \*\*\* is  $p < \text{or} = 0.001$ ; \*\* is  $p < \text{or} = 0.01$ ; \* is  $p < \text{or} = 0.05$ ; non significant (ns) is  $p > 0.5$ .

**eTable 5.** Mean Cerebrospinal Fluid Neurofilament Light Ratios per 10-Years Age Ranges

A

|      | uRRMS/HC                 | tRRMS/HC               | PPMS/HC                  | uRRMS/tRRMS              | PPMS/uRRMS               |
|------|--------------------------|------------------------|--------------------------|--------------------------|--------------------------|
| Age  | ratio (95% CI), p        | ratio (95% CI), p      | ratio (95% CI), p        | ratio (95% CI), p        | ratio (95% CI), p        |
| 20 y | 8.3 (6.2-11.1), ****     | 5.8 (3.8-8.8), ****    | 5.1 (2-13.1), ****       | 1.4 (1-2.1), <i>ns</i>   | 0.6 (0.2-1.6), <i>ns</i> |
| 30 y | 5.4 (4.2-6.8), ****      | 4.1 (3-5.7), ****      | 3.7 (1.8-7.4), ****      | 1.3 (1-1.7), <i>ns</i>   | 0.7 (0.4-1.4), <i>ns</i> |
| 40 y | 3.5 (2.8-4.4), ****      | 3 (2.2-4), ****        | 2.7 (1.6-4.3), ****      | 1.2 (0.9-1.4), <i>ns</i> | 0.8 (0.5-1.2), <i>ns</i> |
| 50 y | 2.2 (1.7-2.9), ****      | 2.2 (1.5-3), ****      | 1.9 (1.3-2.8), ****      | 1 (0.8-1.4), <i>ns</i>   | 0.9 (0.6-1.2), <i>ns</i> |
| 60 y | 1.5 (1.1-2.0), **        | 1.6 (1.0-2.4), **      | 1.4 (0.9-2.2), <i>ns</i> | 0.9 (0.6-1.4), <i>ns</i> | 0.9 (0.6-1.5), <i>ns</i> |
| 70 y | 0.9 (0.6-1.4), <i>ns</i> | 1.1 (0.6-2), <i>ns</i> | 1 (0.5-2), <i>ns</i>     | 0.8 (0.5-1.5), <i>ns</i> | 1.1 (0.5-2.1), <i>ns</i> |

B

|      | uRRMS/HC                 | SPMS/HC                  | SPMS/uRRMS               |
|------|--------------------------|--------------------------|--------------------------|
| Age  | ratio (95% CI), p        | ratio (95% CI), p        | ratio (95% CI), p        |
| 20 y | 8.3 (6.2-11.1), ****     | 4.2 (1.8-9.6), ****      | 0.5 (0.2-1.1), <i>ns</i> |
| 30 y | 5.4 (4.2-6.8), ****      | 3.3 (1.8-6), ****        | 0.6 (0.3-1.1), <i>ns</i> |
| 40 y | 3.5 (2.8-4.4), ****      | 2.5 (1.7-3.8), ****      | 0.7 (0.5-1.1), <i>ns</i> |
| 50 y | 2.2 (1.7-2.9), ****      | 2.0(1.4-2.7), ****       | 0.9 (0.6-1.2), <i>ns</i> |
| 60 y | 1.5 (1.1-2), **          | 1.5 (1-2.3), *           | 1.0 (0.7-1.5), <i>ns</i> |
| 70 y | 0.9 (0.6-1.4), <i>ns</i> | 1.2 (0.7-2.1), <i>ns</i> | 1.2 (0.7-2.2), <i>ns</i> |

C

|      | CIS/HC                   | ON/HC                    | uRRMS/HC                 | CIS/IND                  | ON/IND                    | uRRMS/IND                | uRRMS/CIS                | uRRMS vs ON              | ON/CIS                   |
|------|--------------------------|--------------------------|--------------------------|--------------------------|---------------------------|--------------------------|--------------------------|--------------------------|--------------------------|
| Age  | ratio (95% CI), p         | ratio (95% CI), p        | ratio (95% CI), p        | ratio (95% CI), p        | ratio (95% CI), p        |
| 20 y | 4.4 (3.2-6), ****        | 4.4 (2.1-9.2), ****      | 8.3 (6.2-11.1), ****     | 1.3 (0.8-1.7), <i>ns</i> | 1.3 (0.5-2.5), <i>ns</i>  | 2.5 (1.7-3.3), ****      | 1.9 (1.4-2.5), ****      | 1.9 (0.9-4.1), <i>ns</i> | 1.0 (0.5-2.2), <i>ns</i> |
| 30 y | 3.4 (2.6-4.4), ****      | 3.9 (2.1-7.4), ****      | 5.4 (4.2-6.8), ****      | 1.0(0.7-1.3), <i>ns</i>  | 1.1 (0.6-2.5), <i>ns</i>  | 1.7 (1.1-2.0), ****      | 1.6 (1.3-1.9), ****      | 1.4 (0.7-2.7), <i>ns</i> | 1.2 (0.6-2.3), <i>ns</i> |
| 40 y | 2.6 (2-3.4), ****        | 3.5 (1.9-6.4), ****      | 3.5 (2.8-4.4), ****      | 0.8 (0.6-1.0), <i>ns</i> | 1.1 (0.6-2.00), <i>ns</i> | 1.1 (0.8-1.3), <i>ns</i> | 1.3 (1.1-1.6), ****      | 1.0 (0.5-1.9), <i>ns</i> | 1.3 (0.7-2.6), <i>ns</i> |
| 50 y | 2.1 (1.5-2.8), ****      | 3.1 (1.6-6.2), ****      | 2.2 (1.7-2.9), ****      | 0.7 (0.5-0.9), ****      | 1.0 (0.5-2), <i>ns</i>    | 0.7 (0.6-0.9), ****      | 1.1 (0.8-1.4), <i>ns</i> | 0.7 (0.4-1.5), <i>ns</i> | 1.5 (0.7-3.2), <i>ns</i> |
| 60 y | 1.6 (1.1-2.4), **        | 2.8 (1.2-6.4), **        | 1.5 (1.1-2), **          | 0.6 (0.4-0.8), ****      | 1.0 (0.4-2.4), <i>ns</i>  | 0.5 (0.4-0.7), ****      | 0.9 (0.6-1.3), <i>ns</i> | 0.5 (0.2-1.2), <i>ns</i> | 1.7 (0.7-4.3), <i>ns</i> |
| 70 y | 1.2 (0.7-2.1), <i>ns</i> | 2.5 (0.9-6.9), <i>ns</i> | 0.9 (0.6-1.4), <i>ns</i> | 0.5 (0.3-0.8), ****      | 0.9 (0.3-2.5), <i>ns</i>  | 0.4 (0.3-0.5), ****      | 0.8 (0.5-1.3), <i>ns</i> | 0.4 (0.1-1.1), <i>ns</i> | 2.0 (0.7-6.1), <i>ns</i> |

D

|      | AD/HC                  | FTD/HC                 | VaD/HC                 | DLB/HC                  | AD/FTD                 | DLB/AD            | VaD/AD                 |
|------|------------------------|------------------------|------------------------|-------------------------|------------------------|-------------------|------------------------|
| Age  | ratio (95% CI),<br>p   | ratio (95% CI),<br>p   | ratio (95% CI),<br>p   | ratio (95% CI),<br>p    | ratio (95% CI),<br>p   | ratio (95% CI), p | ratio (95% CI), p      |
| 50 y | 2.2 (1.7-2.8),<br>**** | 5.9 (4.3-8.3),<br>**** | 3.1 (1.9-5),<br>****   | 1.7 (0.8-3.7),<br>ns    | 0.4 (0.3-0.5),<br>**** | 0.8 (0.4-1.7), ns | 1.4 (0.9-2.3), ns      |
| 60 y | 2 (1.6-2.3),<br>****   | 4.5 (3.6-5.6),<br>**** | 2.7 (1.9-3.7),<br>**** | 1.6 (1.0-2.6),*<br>**** | 0.4 (0.3-0.6),<br>**** | 0.8 (0.5-1.3), ns | 1.4 (1-1.9), *         |
| 70 y | 1.7 (1.5-2),<br>****   | 3.4 (2.7-4.2),<br>**** | 2.3 (1.9-2.9),<br>**** | 1.5 (1.1-2),<br>****    | 0.5 (0.4-0.6),<br>**** | 0.9 (0.7-1.1), ns | 1.3 (1.1-1.6),<br>**** |
| 80 y | 1.5 (1.3-1.8),<br>**** | 2.5 (1.8-3.5),<br>**** | 2 (1.6-2.5),<br>****   | 1.4 (1-1.9), ns         | 0.6 (0.4-0.8),<br>**** | 0.9 (0.7-1.2), ns | 1.3 (1.1-1.6),<br>**** |
| 90 y | 1.3 (1-1.7),<br>***    | 1.9 (1.2-3.1),<br>***  | 1.7 (1.2-2.4),<br>**** | 1.3 (0.7-2.3),<br>ns    | 0.7 (0.4-1.1),<br>ns   | 1 (0.5-1.7), ns   | 1.3 (1-1.7), ns        |

E

|      | SCD/HC              | MCI/HC            | AD/HC               | AD/MCI            |
|------|---------------------|-------------------|---------------------|-------------------|
| Age  | ratio (95% CI), p   | ratio (95% CI), p | ratio (95% CI), p   | ratio (95% CI), p |
| 50 y | 0.7 (0.1-4.3), ns   | 1.7 (0.9-3.4), ns | 2.2 (1.7-2.8), **** | 1.3 (0.6-2.6), ns |
| 60 y | 1.1 (0.5-2.5), ns   | 1.6 (1.0-2.4), ns | 2 (1.6-2.3), ****   | 1.3 (0.8-2), ns   |
| 70 y | 1.7 (0.5-6.4), ns   | 1.4 (1-1.9), **   | 1.7 (1.5-2), ****   | 1.2 (0.9-1.7), ns |
| 80 y | 2.6 (0.2-32.5), ns  | 1.3 (0.9-1.7), ns | 1.5 (1.3-1.8), **** | 1.2 (0.9-1.7), ns |
| 90 y | 4.0 (0.1-180.8), ns | 1.1 (0.7-1.9), ns | 1.3 (1-1.7), ***    | 1.2 (0.7-2), ns   |
|      | SCD/HC              | MCI/HC            | AD/HC               | AD/MCI            |
| Age  | ratio (95% CI), p   | ratio (95% CI), p | ratio (95% CI), p   | ratio (95% CI), p |
| 50 y | 0.7 (0.1-4.3), ns   | 1.7 (0.9-3.4), ns | 2.2 (1.7-2.8), **** | 1.3 (0.6-2.6), ns |
| 60 y | 1.1 (0.5-2.5), ns   | 1.6 (1.0-2.4), ns | 2 (1.6-2.3), ****   | 1.3 (0.8-2), ns   |

|      |                     |                   |                     |                   |
|------|---------------------|-------------------|---------------------|-------------------|
| 70 y | 1.7 (0.5-6.4), ns   | 1.4 (1-1.9), **   | 1.7 (1.5-2), ****   | 1.2 (0.9-1.7), ns |
| 80 y | 2.6 (0.2-32.5), ns  | 1.3 (0.9-1.7), ns | 1.5 (1.3-1.8), **** | 1.2 (0.9-1.7), ns |
| 90 y | 4.0 (0.1-180.8), ns | 1.1 (0.7-1.9), ns | 1.3 (1-1.7), ***    | 1.2 (0.7-2), ns   |

F

|      |                   | FTD vs HC           | FTD/ALS vs HC            | pgFTD vs FTD        | FTD/ALS vs FTD     |
|------|-------------------|---------------------|--------------------------|---------------------|--------------------|
| Age  | ratio (95% CI), p | ratio (95% CI), p   | ratio (95% CI), p        | ratio (95% CI), p   | ratio (95% CI), p  |
| 50 y | 1.2 (0.7-2.1), ns | 5.9 (4.3-8.3), **** | 20.9 (6.7-64.6),<br>**** | 0.2 (0.1-0.4), **** | 3.5 (1.1-11.2), ** |
| 60 y | 1.2 (0.6-2.4), ns | 4.5 (3.6-5.6), **** | 11.8 (5.5-25.1),<br>**** | 0.3 (0.1-0.5), **** | 2.6 (1.2-5.7), *** |
| 70 y | 1.2 (0.5-3.4), ns | 3.4 (2.7-4.2), **** | 6.6 (2.2-19.6), ****     | 0.4 (0.1-1), *      | 2.0 (0.7-5.9), ns  |
| 80 y | 1.2 (0.3-5.1), ns | 2.5 (1.8-3.5), **** | 3.7 (0.6-21.5), ns       | 0.5 (0.1-2.1), ns   | 1.5 (0.3-8.7), ns  |
| 90 y | 1.2 (0.2-7.9), ns | 1.9 (1.2-3.1), ***  | 2.1 (0.2-25.6), ns       | 0.7 (0.1-4.3), ns   | 1.1 (0.1-13.9), ns |

G

|      | PD vs HC          | PDD vs HC         | MSA vs HC           | PSP vs HC           | CBS vs HC            | DLB vs HC         | PSP vs PD           | MS A vs PD          | CBS vs PD            |
|------|-------------------|-------------------|---------------------|---------------------|----------------------|-------------------|---------------------|---------------------|----------------------|
| Age  | ratio (95% CI), p | ratio (95% CI), p | ratio (95% CI), p   | ratio (95% CI), p   | ratio (95% CI), p    | ratio (95% CI), p | ratio (95% CI), p   | ratio (95% CI), p   | ratio (95% CI), p    |
| 50 y | 1.1 (0.8-1.4), ns | 1.4 (0.5-3.5), ns | 6.3 (4-9.9), ****   | 4 (1.8-8.6), ****   | 5.6 (1.8-17.8), **** | 1.7 (0.8-3.7), ns | 3.7 (1.7-8.3), **** | 5.9 (3.6-9.7), **** | 5.3 (1.6-17.1), **** |
| 60 y | 1.1 (0.9-1.4), ns | 1.3 (0.7-2.4), ns | 4.3 (3.2-5.6), **** | 3.2 (2-5.1), ****   | 4.6 (2.4-8.9), ****  | 1.6 (1.0-2.6), *  | 2.9 (1.8-4.8), **** | 3.9 (2.9-5.3), **** | 4.2 (2.1-8.3), ****  |
| 70 y | 1.1 (0.9-1.4), ns | 1.3 (0.9-1.9), ns | 2.9 (2.1-3.9), **** | 2.6 (1.9-3.5), **** | 3.7 (2.4-5.7), ****  | 1.5 (1.1-2), **** | 2.3 (1.7-3.2), **** | 2.6 (1.9-3.6), **** | 3.4 (2.1-5.3), ****  |
| 80 y | 1.1 (0.8-1.5), ns | 1.3 (0.8-2), ns   | 1.9 (1.2-3.2), ***  | 2.1 (1.3-3.4), **** | 3 (1.4-6.5), ****    | 1.4 (1-1.9), ns   | 1.9 (1.1-3.1), **   | 1.7 (1-3), ns       | 2.7 (1.2-6), **      |
| 90 y | 1.1 (0.7-1.8), ns | 1.3 (0.6-2.7), ns | 1.3 (0.6-2.8), ns   | 1.7 (0.8-3.7), ns   | 2.5 (0.7-8.8), ns    | 1.3 (0.7-2.3), ns | 1.5 (0.6-3.4), ns   | 1.1 (0.5-2.6), ns   | 2.1 (0.6-8), ns      |

**Legend** HC, healthy controls; A CIS, clinically isolated syndrome; ON, optic neuritis; uRRMS, untreated relapsing remitting multiple sclerosis; IND, inflammatory neurological diseases. B tRRMS, treated relapsing remitting multiple sclerosis; uRRMS, untreated relapsing remitting multiple sclerosis; PPMS, primary progressive multiple sclerosis. C uRRMS, untreated relapsing remitting multiple sclerosis; SPMS, secondary progressive multiple sclerosis. D AD, Alzheimer's disease; FTD, frontotemporal dementia; VaD, vascular dementia; DLB, Dementia with Lewy bodies. E pgFTD, presymptomatic genetic FTD; FTD, frontotemporal dementia; FTD/ALS, combined FTD and ALS. F SCD, subjective cognitive decline; MCI, mild cognitive impairment; AD, Alzheimer's disease. G PD, Parkinson's disease; PDD, PD dementia; MSA, multiple systems atrophy; PSP, progressive supranuclear palsy; CBS, corticobasal syndrome, DLB, dementia with Lewy Bodies. P-values: \*\*\*\* is  $p < \text{or} = 0.0001$ ; \*\*\* is  $p < \text{or} = 0.001$ ; \*\* is  $p < \text{or} = 0.01$ ; \* is  $p < \text{or} = 0.05$ ; non significant (ns) is  $p > 0.5$ . 95% CI, 95% confidence intervals.



**eTable 6.** Intercohort Heterogeneity Coefficient for Diagnostic Categories With More Than One Contributing Cohort

| diagnosis      | I2   | Number of cohorts |
|----------------|------|-------------------|
| HC             | 0.35 | 30                |
| CIS            | 0.01 | 9                 |
| ON             | 0    | 3                 |
| Treated RRMS   | 0    | 6                 |
| Untreated RRMS | 0.01 | 12                |
| SPMS           | 0.02 | 8                 |
| PPMS           | 0.02 | 6                 |
| IND            | 0    | 3                 |
| SNC            | 0    | 2                 |
| ALS            | 0.04 | 2                 |
| CIDP/GBS       | 0    | 2                 |
| FTD            | 0.13 | 5                 |
| MCI            | 0    | 3                 |
| AD             | 0.21 | 11                |
| iNPH           | 0    | 2                 |
| VaD            | 0.36 | 2                 |
| MD             | 0.58 | 2                 |
| DNS            | 0.83 | 2                 |
| PD             | 0.09 | 5                 |
| PDD            | 0.84 | 2                 |
| MSA            | 0.43 | 5                 |
| PSP            | 0.30 | 4                 |
| CBS            | 0    | 4                 |
| DLB            | 0.83 | 2                 |
| iHIV           | 0.96 | 2                 |
| Stroke         | 0.93 | 2                 |
| NID            | 0.53 | 6                 |

**Legend** Inter-cohort heterogeneity coefficient (I2). Low I2 < 0.2; intermediate I2 0.2-0.6; high I2 >0.6. HC, healthy controls; SNC, subjective neurological complaints; CIS, clinically isolated syndrome; ON, optic neuritis; RRMS, relapsing remitting multiple sclerosis; PPMS, primary progressive multiple sclerosis; SPMS, secondary progressive multiple sclerosis; IND, inflammatory neurological disorders other than multiple sclerosis; SNC, subjective neurological complaint; ALS, amyotrophic lateral sclerosis; CIDP/GBS, chronic inflammatory demyelinating polyradiculopathy and Guillain-Barré syndrome; FTD, frontotemporal dementia; MCI, mild cognitive impairment; AD, Alzheimer’s disease; iNPH, idiopathic normal pressure hydrocephalus; VaD, vascular dementia; MD, mixed dementia; DNS, dementia not specified; PD, Parkinson’s disease; PDD, PD dementia; PSP, progressive supranuclear palsy; MSA, multiple systems atrophy; CBS, corticobasal syndrome; DLB, Dementia with Lewy bodies; iHIV, HIV with cognitive impairment; pHD, premanifest Huntington’s disease; HD, Huntington’s disease; BD, bipolar disorder; NID, non-inflammatory neurological disorders.

## **Glossary**

AD: Alzheimer's disease  
ALS: amyotrophic lateral sclerosis  
BD: bipolar disorder  
CBS: corticobasal syndrome  
CIDP/GBS: chronic inflammatory polyradiculopathy/Guillain Barré syndrome  
CIS: clinically isolated syndrome  
DLB: dementia with Lewy bodies  
DNS: dementia not specified  
FTD: frontotemporal dementia  
FTD/ALS: frontotemporal dementia/amyotrophic lateral sclerosis  
HC: healthy controls  
HD: Huntington's disease  
HIV: human immunodeficiency virus  
iHIV: human immunodeficiency virus with cognitive impairment  
IND: inflammatory neurological conditions of the central nervous system  
iNPH: idiopathic normal pressure hydrocephalus  
MCI: mild cognitive impairment  
MD: mixed dementia  
MSA: multiple system atrophy  
NID: non-inflammatory neurological conditions of the central nervous system  
ON: optic neuritis  
PD: Parkinson's disease  
PDD: Parkinson's disease dementia  
pgFTD: presymptomatic genetic frontotemporal dementia  
pHD: premanifest Huntington's disease  
PPMS: primary progressive multiple sclerosis  
PSP: progressive supranuclear palsy  
SCD: subjective cognitive decline  
SNC: subjective neurological complaint  
SPMS: secondary progressive multiple sclerosis  
tRRMS: treated relapsing-remitting multiple sclerosis  
uRRMS: untreated relapsing-remitting multiple sclerosis  
VaD: vascular dementia
